# Supplementary material
Source: MDPI journal article supplement (https://www.mdpi.com/2076-3417/12/19/10161)
Supplement: s1 [file s1 › applsci-1916596-supplementary.pdf]

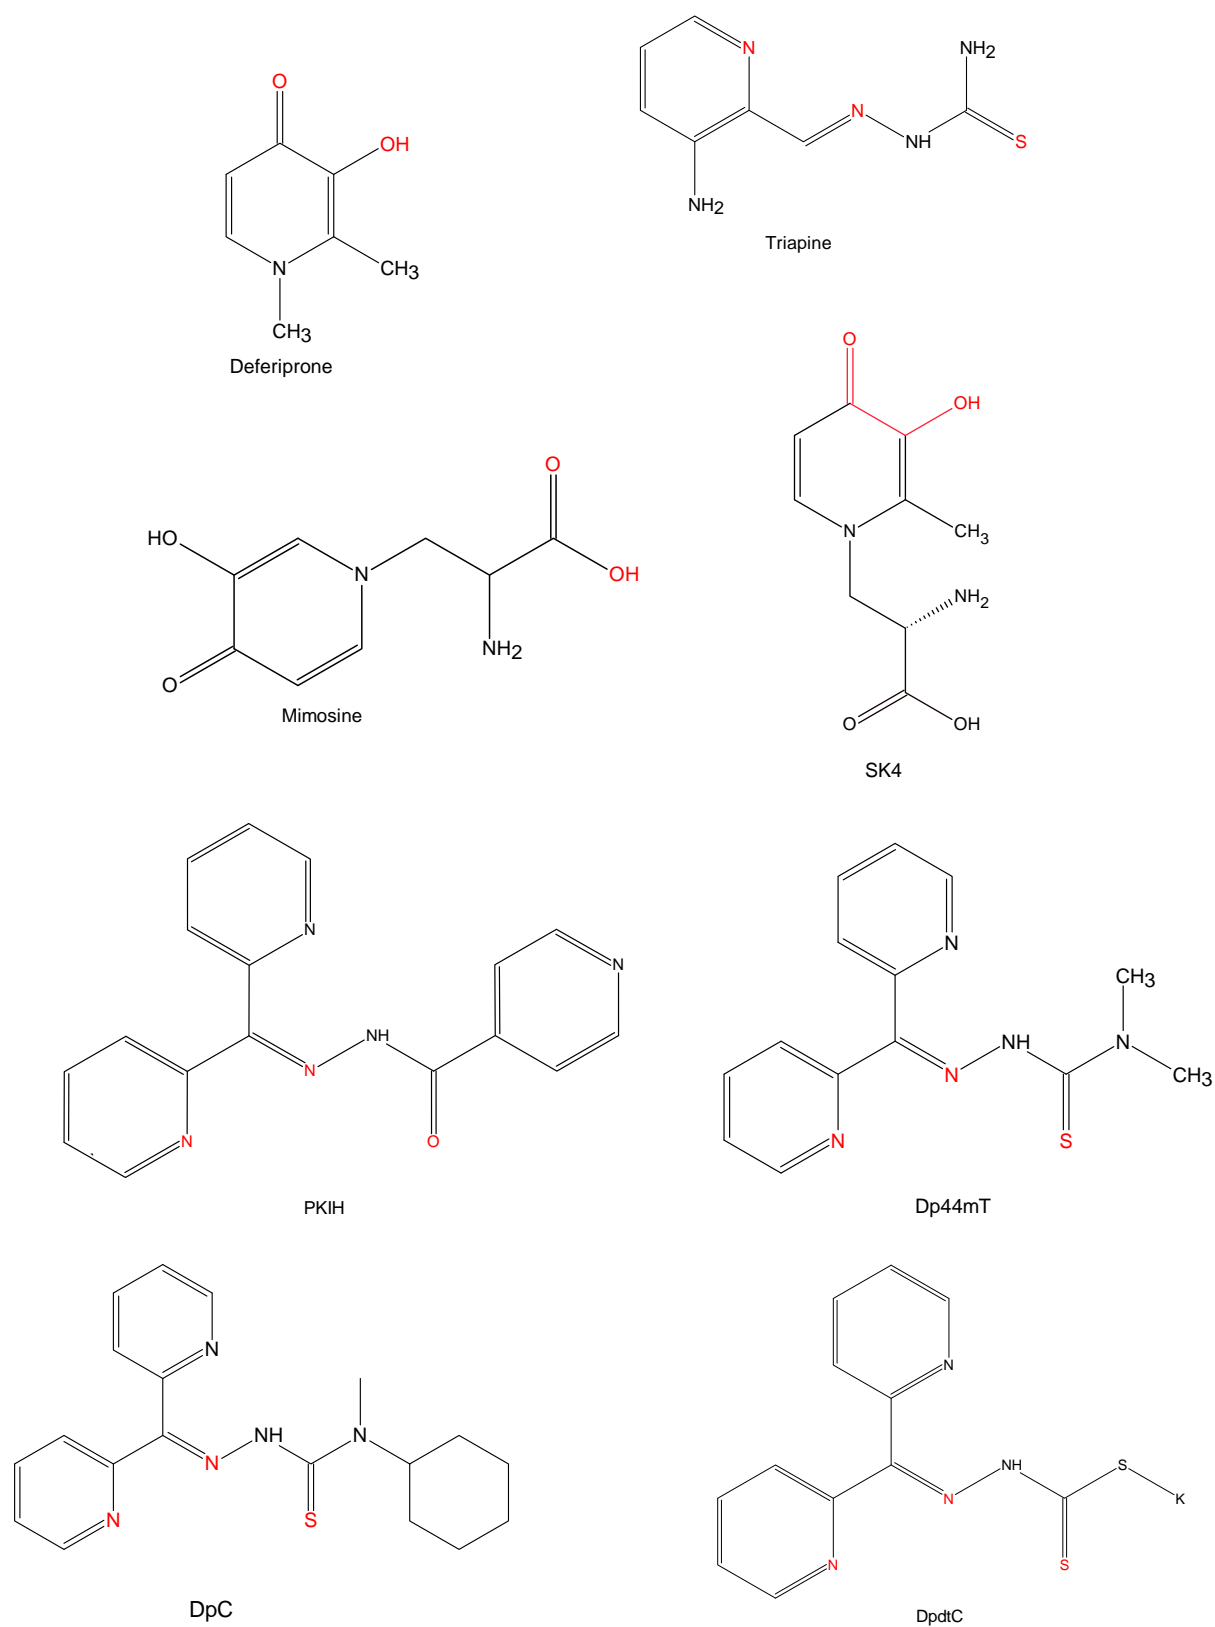

Figure S1. Shows the main redox active iron chelators, the elements in red show the metal binding groups. In this case these are the groups that bind with iron to form the iron complex.
